# Supplementary material for: Identification of fallopian tube microbiota and its association with ovarian cancer
Source: eLife. 2024 Mar 7;12:RP89830. doi: 10.7554/eLife.89830 (PMC10942644; doi:10.7554/eLife.89830)
Supplement: Figure 4—source data 1. [file elife-89830-fig4-data1.xlsx]

## Sheet: Fina_Figure_04
		Fallopian Tube and Ovary		Cervix		Paracolic Gutter
		Cancer	Non-cancer	Cancer	Non-cancer	Cancer	Non-cancer	Predominant niche
	Klebsiella	16.0494	9.43396	1.23457	1.88679	17.284	7.54717	G
	Faecalibacterium prausnitzii	7.40741	1.88679	7.40741	3.77358	2.46914	0	G
	Ruminiclostridium	4.93827	0	4.93827	0.943396	3.7037	0	G
	Roseburia	4.93827	0	2.46914	2.83019	2.46914	0	G
	Clostridiales	6.17284	1.88679	3.7037	0.943396	4.93827	0	B
	Streptococcus mitis group	6.17284	1.88679	2.46914	0	1.23457	0	O
	Corynebacterium simulans/striatum	4.93827	0.943396	2.46914	0.943396	1.23457	0	O
	[Eubacterium] hallii	3.7037	0	2.46914	1.88679	0	0.943396	G
	Dialister invisus	3.7037	0	1.23457	0.943396	2.46914	0	O
	Fenollaria massiliensis/timonensis	6.17284	2.83019	13.5802	7.54717	2.46914	0	GV
	Anaerococcus mediterraneensis	4.93827	1.88679	19.7531	9.43396	1.23457	0	V
	Blautia	4.93827	1.88679	1.23457	1.88679	1.23457	0.943396	G
	Bacteroides uniformis	3.7037	0.943396	3.7037	1.88679	2.46914	0.943396	G
	Gemella haemolysans/sanguinis	3.7037	0.943396	2.46914	2.83019	2.46914	0	O
	Ruminococcus bromii	3.7037	0.943396	1.23457	1.88679	3.7037	0	G
	Tissierellia	3.7037	0.943396	2.46914	0.943396	1.23457	0	G
	Granulicatella elegans	3.7037	0.943396	3.7037	0.943396	0	0	O
	Streptococcus parasanguinis	7.40741	4.71698	2.46914	0.943396	0	0	O
	Bacteroides dorei	2.46914	0	2.46914	0.943396	1.23457	0	G
	Parabacteroides merdae	2.46914	0	2.46914	0	2.46914	0	G
	Actinotignum urinale	2.46914	0	3.7037	0.943396	0	0	V
	Phascolarctobacterium faecium	2.46914	0	1.23457	0.943396	1.23457	0	G
	Corynebacterium sundsvallense	2.46914	0	2.46914	0	0	0	B
	Neisseriaceae	4.93827	2.83019	1.23457	0.943396	0	0	OV
	Porphyromonas somerae	3.7037	1.88679	6.17284	0.943396	4.93827	0	VS
	Blautia wexlerae	3.7037	1.88679	3.7037	0.943396	1.23457	0.943396	G
	Staphylococcus pasteuri/warneri	3.7037	1.88679	1.23457	0.943396	1.23457	0	S
	Peptoniphilus	7.40741	5.66038	16.0494	12.2642	2.46914	0	GV
	Lactobacillus crispatus	2.46914	0.943396	13.5802	26.4151	3.7037	0.943396	V
	Bacteroides vulgatus	2.46914	0.943396	3.7037	2.83019	2.46914	0.943396	G
	Haemophilus parainfluenzae	2.46914	0.943396	6.17284	0.943396	1.23457	0.943396	O
	Peptococcus niger	2.46914	0.943396	4.93827	1.88679	2.46914	0	GO
	Actinomyces europaeus	2.46914	0.943396	2.46914	1.88679	1.23457	0	GO
	Lactobacillus gasseri/johnsonii	3.7037	2.83019	13.5802	13.2075	2.46914	1.88679	GV
	Klebsiella variicola	3.7037	2.83019	0	1.88679	2.46914	4.71698	G
	Varibaculum anthropi	2.46914	1.88679	19.7531	4.71698	0	0	V
	Lagierella	2.46914	1.88679	6.17284	1.88679	2.46914	0	G
	Varibaculum cambriense	1.23457	0.943396	13.5802	2.83019	0	0	V
	Facklamia hominis	1.23457	0.943396	11.1111	1.88679	1.23457	0	V
	Bifidobacterium longum	1.23457	0.943396	7.40741	2.83019	0	0	G
	Casaltella massiliensis	1.23457	0.943396	4.93827	0.943396	3.7037	0	G
	Prevotella corporis	1.23457	0.943396	4.93827	2.83019	0	0	GO
	Corynebacterium tuberculostearicum	1.23457	0.943396	6.17284	0.943396	0	0	S
	Prevotella amnii	1.23457	0.943396	1.23457	2.83019	0	0.943396	V
	Varibaculum anthropi/cambriense	1.23457	0.943396	4.93827	0.943396	0	0	V
	Lactobacillus gasseri	1.23457	0.943396	0	2.83019	0	1.88679	V
	Corynebacterium mycetoides	1.23457	0.943396	2.46914	0	0	0	V
	Campylobacter ureolyticus	4.93827	4.71698	16.0494	8.49057	3.7037	0.943396	G
	Candidatus Peptoniphilus massiliensis	3.7037	3.77358	6.17284	0.943396	4.93827	1.88679	G
	Lachnospiraceae	3.7037	3.77358	4.93827	3.77358	1.23457	0	B
	Ruminococcaceae	7.40741	7.54717	7.40741	0	6.17284	1.88679	G
	Anaerococcus vaginalis	2.46914	2.83019	20.9877	12.2642	3.7037	0.943396	V
	Klebsiella granulomatis/pneumoniae	2.46914	2.83019	0	1.88679	4.93827	3.77358	G
	Corynebacterium glucuronolyticum	2.46914	2.83019	1.23457	0.943396	2.46914	0.943396	V
	Streptococcus anginosus	1.23457	1.88679	30.8642	14.1509	1.23457	0	O
	Atopobium vaginae	1.23457	1.88679	4.93827	12.2642	0	0.943396	V
	Staphylococcus haemolyticus	4.93827	5.66038	1.23457	0.943396	1.23457	0.943396	S
	Lactobacillus jensenii	1.23457	2.83019	14.8148	22.6415	0	0	V
	Prevotella buccalis	1.23457	2.83019	12.3457	2.83019	3.7037	0.943396	OV
	Actinomyces neuii	1.23457	2.83019	8.64198	4.71698	1.23457	0.943396	V
	Corynebacterium pyruviciproducens	1.23457	2.83019	8.64198	2.83019	0	0	V
	Veillonella parvula	1.23457	2.83019	1.23457	0.943396	0	0	OV
	Porphyromonas uenonis	0	1.88679	9.87654	10.3774	1.23457	0.943396	V
	Peptoniphilus coxii	0	1.88679	8.64198	10.3774	0	0.943396	OV
	Actinotignum schaalii	0	1.88679	11.1111	6.60377	1.23457	0	V
	Anaerococcus prevotii/tetradius	0	1.88679	6.17284	7.54717	0	0	V
	Sneathia amnii	0	1.88679	2.46914	6.60377	0	0.943396	V
	Megasphaera genomosp. type_1	0	1.88679	2.46914	5.66038	1.23457	0.943396	V
	Eggerthella sp. type 1 (species)	0	1.88679	1.23457	7.54717	0	0	V
	Parvimonas micra	0	1.88679	2.46914	5.66038	1.23457	0	V
	BVAB2	0	1.88679	1.23457	3.77358	0	0.943396	V
	BVAB1	0	1.88679	1.23457	1.88679	0	0	V
	Prevotella timonensis	3.7037	5.66038	18.5185	10.3774	1.23457	0	V
	Peptoniphilus grossensis/harei	6.17284	8.49057	30.8642	17.9245	3.7037	2.83019	G
	Mobiluncus curtisii	4.93827	7.54717	20.9877	8.49057	3.7037	1.88679	V
	Actinomyces ihumii/radingae	0	2.83019	2.46914	0.943396	1.23457	1.88679	G
	Veillonella atypica	2.46914	5.66038	2.46914	1.88679	0	0.943396	GO
	Anaerococcus	14.8148	18.8679	11.1111	6.60377	9.87654	2.83019	GOV
	Lactobacillus iners	2.46914	6.60377	18.5185	23.5849	1.23457	1.88679	V
	Gardnerella vaginalis	1.23457	5.66038	14.8148	17.9245	1.23457	1.88679	V
	Porphyromonas	3.7037	9.43396	3.7037	0.943396	2.46914	0.943396	GOV
	Porphyromonas bennonis	4.93827	11.3208	13.5802	6.60377	6.17284	0	V
	Peptoniphilus rhinitidis	0	6.60377	3.7037	0	1.23457	0	O
	Corynebacterium amycolatum	4.93827	17.9245	8.64198	1.88679	7.40741	6.60377	V
