# Supplementary material for: Identification of fallopian tube microbiota and its association with ovarian cancer
Source: eLife. 2024 Mar 7;12:RP89830. doi: 10.7554/eLife.89830 (PMC10942644; doi:10.7554/eLife.89830)
Supplement: Figure 5—source data 1. [file elife-89830-fig5-data1.xlsx]

## Sheet: Final_Figure_05
		Fallopian Tube and Ovary
		Tumor Histology Type
		Non-serous	Serous	Predominant Niche
	Klebsiella	21.4286	13.2075	G
	Anaerococcus	7.14286	18.8679	GOV
	Faecalibacterium prausnitzii	3.57143	9.43396	G
	Peptoniphilus	3.57143	9.43396	GV
	Ruminococcaceae	3.57143	9.43396	G
	Streptococcus parasanguinis	10.7143	5.66038	O
	Clostridiales	3.57143	7.54717	B
	Fenollaria massiliensis/timonensis	7.14286	5.66038	GV
	Peptoniphilus grossensis/harei	0	9.43396	G
	Streptococcus mitis group	3.57143	7.54717	O
	Anaerococcus mediterraneensis	7.14286	3.77358	V
	Blautia	7.14286	3.77358	G
	Campylobacter ureolyticus	3.57143	5.66038	G
	Corynebacterium amycolatum	3.57143	5.66038	V
	Corynebacterium simulans/striatum	3.57143	5.66038	O
	Mobiluncus curtisii	0	7.54717	V
	Neisseriaceae	3.57143	5.66038	OV
	Porphyromonas bennonis	3.57143	5.66038	V
	Roseburia	3.57143	5.66038	G
	Ruminiclostridium	3.57143	5.66038	G
	Staphylococcus haemolyticus	7.14286	3.77358	S
	[Eubacterium] hallii	3.57143	3.77358	G
	Bacteroides uniformis	0	5.66038	G
	Blautia wexlerae	3.57143	3.77358	G
	Candidatus Peptoniphilus massiliensis	0	5.66038	G
	Dialister invisus	0	5.66038	O
	Gemella haemolysans/sanguinis	0	5.66038	O
	Granulicatella elegans	3.57143	3.77358	O
	Klebsiella variicola	3.57143	3.77358	G
	Lachnospiraceae	3.57143	3.77358	B
	Lactobacillus gasseri/johnsonii	3.57143	3.77358	GV
	Porphyromonas	0	5.66038	GOV
	Porphyromonas somerae	3.57143	3.77358	VS
	Prevotella timonensis	3.57143	3.77358	V
	Ruminococcus bromii	3.57143	3.77358	G
	Staphylococcus pasteuri/warneri	0	5.66038	S
	Tissierellia	3.57143	3.77358	G
	Actinomyces europaeus	0	3.77358	GO
	Actinotignum urinale	3.57143	1.88679	V
	Anaerococcus vaginalis	0	3.77358	V
	Bacteroides dorei	0	3.77358	G
	Bacteroides vulgatus	3.57143	1.88679	G
	Corynebacterium glucuronolyticum	0	3.77358	V
	Corynebacterium sundsvallense	0	3.77358	B
	Haemophilus parainfluenzae	0	3.77358	O
	Klebsiella granulomatis/pneumoniae	3.57143	1.88679	G
	Lactobacillus crispatus	3.57143	1.88679	V
	Lactobacillus iners	0	3.77358	V
	Lagierella	0	3.77358	G
	Parabacteroides merdae	0	3.77358	G
	Peptococcus niger	0	3.77358	GO
	Phascolarctobacterium faecium	3.57143	1.88679	G
	Varibaculum anthropi	0	3.77358	V
	Veillonella atypica	3.57143	1.88679	GO
	Actinomyces neuii	0	1.88679	V
	Atopobium vaginae	0	1.88679	V
	Bifidobacterium longum	0	1.88679	G
	Casaltella massiliensis	0	1.88679	G
	Corynebacterium mycetoides	0	1.88679	V
	Corynebacterium pyruviciproducens	3.57143	0	V
	Corynebacterium tuberculostearicum	0	1.88679	S
	Facklamia hominis	0	1.88679	V
	Gardnerella vaginalis	0	1.88679	V
	Lactobacillus gasseri	0	1.88679	V
	Lactobacillus jensenii	0	1.88679	V
	Prevotella amnii	0	1.88679	V
	Prevotella buccalis	0	1.88679	OV
	Prevotella corporis	3.57143	0	GO
	Streptococcus anginosus	0	1.88679	O
	Varibaculum anthropi/cambriense	0	1.88679	V
	Varibaculum cambriense	0	1.88679	V
	Veillonella parvula	0	1.88679	OV
